# Supplementary material for: Calcium channel-coupled transcription factors facilitate direct nuclear signaling
Source: Research Square preprint supplement (doi:10.21203/rs.3.rs-6180510/v1), 2025-05-13
Supplement: Supplementary file 1 [file 078afe47b2fbd1083a2e91de.pdf]

Supplemental information for

## **Calcium channel-coupled transcription factors facilitate direct nuclear signaling**

Eshaan R. Rao<sup>1\*</sup>, Tyler Thaxton<sup>1\*</sup>, Eric Gama<sup>1</sup>, Jack Godfrey<sup>1</sup>, Cenfu Wei<sup>1</sup>, Qiaoshan Lin<sup>2</sup>, Yan Li<sup>2</sup>, Daniel Parviz Hejazi Pastor<sup>1</sup>, Christian Hansel<sup>3</sup>, Xiaofei Du<sup>1#</sup>, Christopher M. Gomez<sup>1#</sup>

<sup>1</sup> Department of Neurology, University of Chicago, Chicago, IL 60637, USA

<sup>2</sup> Center for Research Informatics, University of Chicago, IL 60637, USA

<sup>3</sup> Department of Neurobiology, University of Chicago, Chicago, IL 60637, USA

\*These authors contributed equally to this work

#Correspondence to: [feliciad@uchicago.edu](mailto:feliciad@uchicago.edu), [gomez001@uchicago.edu](mailto:gomez001@uchicago.edu)

## Inventory for Supplemental Information

### **A. Extended data Figure and Figure Legends 1 to 5**

### **B. Tables S1 to S5**

### **C. Videos S1 to S4**

- **Video S1** Live cell imaging of EV-emGFP in cultured rat cortical neurons. Neurons were imaged for 10 minutes following glutamate uncaging.
- **Video S2** Live cell imaging of  $\alpha$ 1CCT in cultured rat cortical neurons. Neurons were imaged for 10 minutes following glutamate uncaging.
- **Video S3** Live cell imaging of  $\alpha$ 1ACT in cultured rat cortical neurons. Neurons were imaged for 10 minutes following glutamate uncaging.
- **Video S4** Live cell imaging of  $\alpha$ 1HCT in cultured rat cortical neurons. Neurons were imaged for 10 minutes following glutamate uncaging.

### **D. Movie Legends**

Videos showing live cell imaging of cultured rat cortical neurons infected with AAV virus expressing either EV-emGFP (A),  $\alpha$ 1CCT-EmGFP (B),  $\alpha$ 1ACT-EmGFP (C), or  $\alpha$ 1HCT (D). Neurons were imaged for 10 minutes following glutamate uncaging. EV-emGFP showed no cyto-nuclear translocation, while  $\alpha$ 1CCT and  $\alpha$ 1ACT showing increased or decreased nuclear translocation following glutamate uncaging, respectively. Additionally,  $\alpha$ 1HCT showed a slight trend of increased nuclear translocation following uncaging. Scale bars represent 20  $\mu$ M.

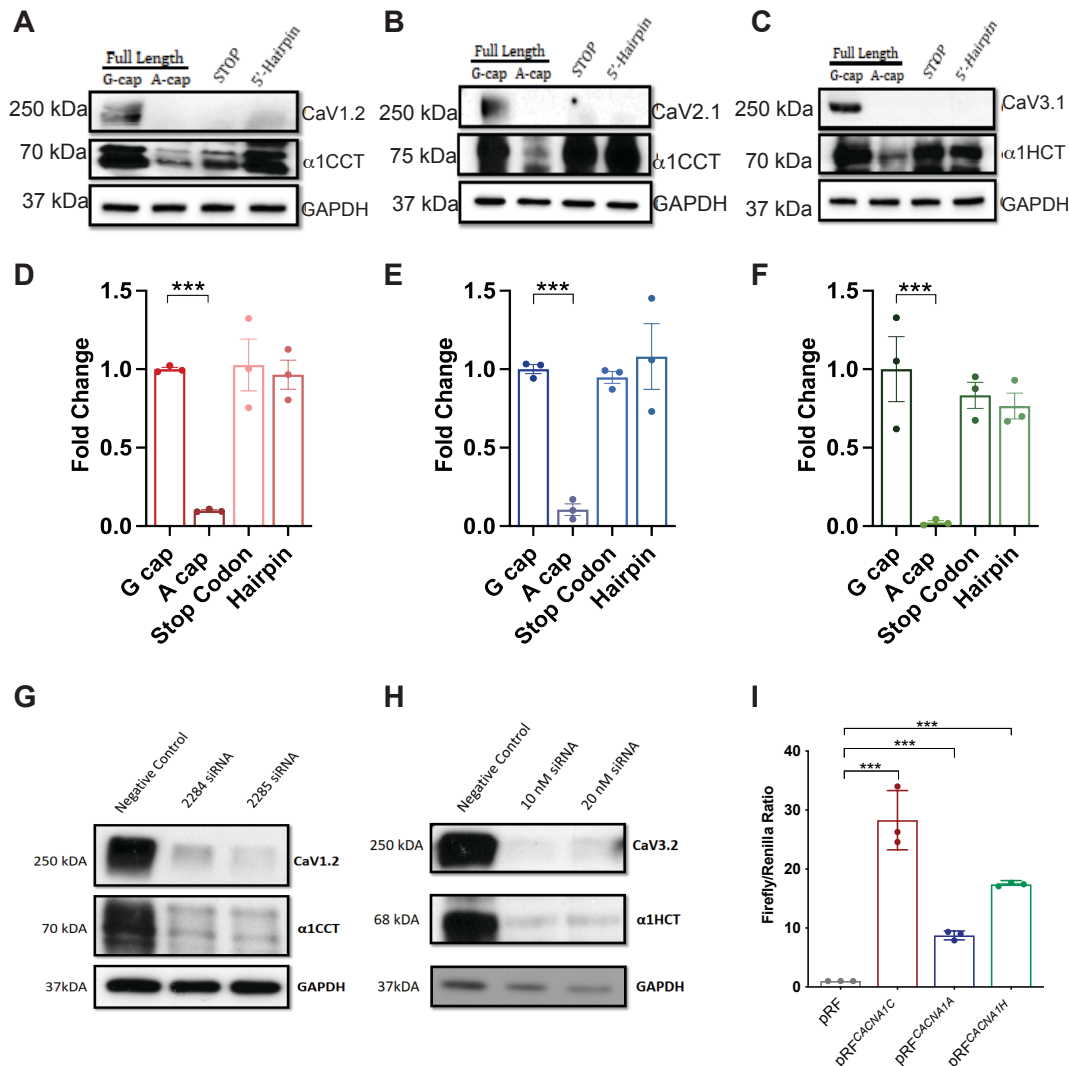

**Extended data Figure 1. *CACNA1C*, *CACNA1A*, and *CACNA1H* mRNAs encode two distinct proteins from overlapping cistrons through a cap-independent mechanism.**

(A, B, and C) Western blot analysis of protein lysates from HEK293T cells transiently transfected with *CACNA1C* (A), *CACNA1A* (B), or *CACNA1H* (C) *in vitro* transcribed mRNA. Full-length mRNAs were capped with either an m7G or an m7A cap. STOP constructs had one or two premature termination codons inserted upstream of C-terminal protein start sites. 5'-hairpin constructs had a large hairpin structure inserted directly downstream of the initiating methionine.

(D, E, and F) qPCR analysis of RNA collected from HEK293T cells transiently transfected with *CACNA1C* (D), *CACNA1A* (E), or *CACNA1H* (F) mRNA. (N = 6 for each condition).

(G, H) Western blot analysis of protein lysates from HEK293 of cell lines stably expressing either *CACNA1C* or *CACNA1H* and transfected with siRNAs directed towards the 5' ends of the *CACNA1C* or *CACNA1H* genes.

(I) Luciferase activity as measured by Firefly/Renilla ratio for the bicistronic vector pRF with 1000-bp insertions directly upstream from α1CCT, α1ACT, or α1HCT initiating methionines, compared to empty vector. (N = 3 for each condition, p<0.001).

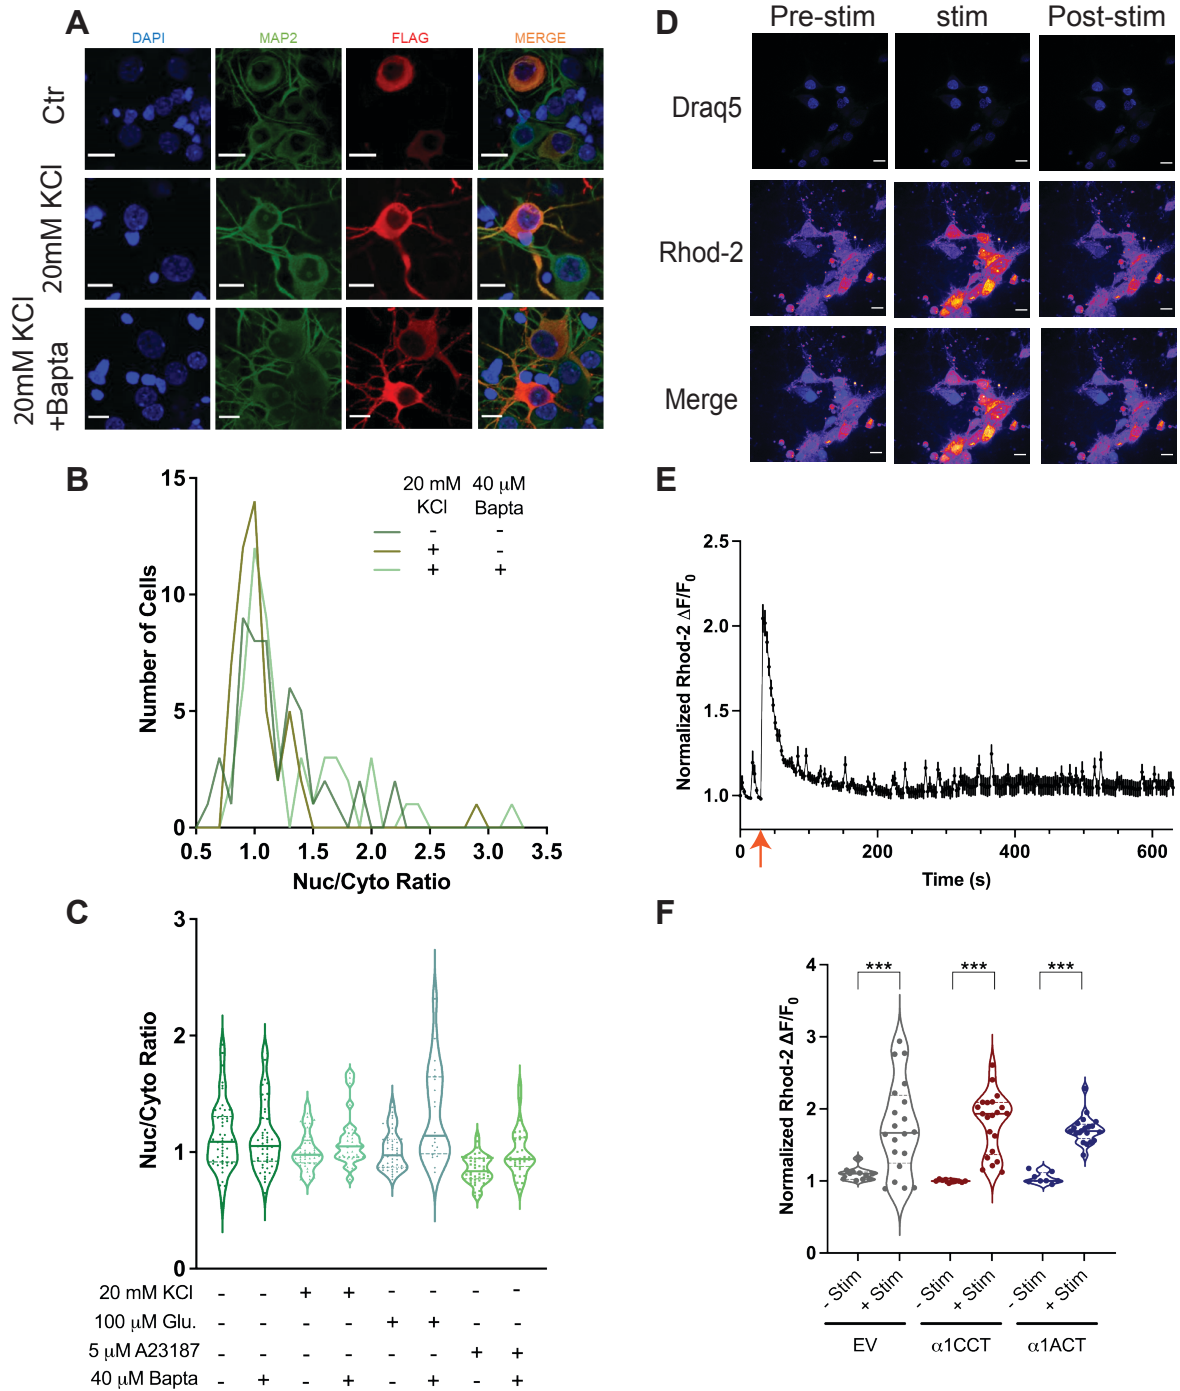

**Extended data Figure 2. Neuronal depolarization does not shift  $\alpha$ 1HCT localization in fixed rat cortical neurons, and intracellular  $\text{Ca}^{2+}$  changes with uncaged glutamate stimulation of live rat cortical neurons expressing EmGFP,  $\alpha$ 1CCT, or  $\alpha$ 1ACT.**

(A) Representative images of fixed rat cortical neurons transfected with  $\alpha$ 1HCT mRNA and treated with 100  $\mu$ M glutamate with or without BAPTA-AM. Fixed neurons were stained with DAPI (blue), MAP2 antibody (green), and 3XFLAG antibody (red). Scale bars = 10 microns.

(B) Quantification of nuclear/cytosolic fluorescence signal of rat cortical neurons transfected with  $\alpha$ 1HCT mRNA with 20mM KCl with or without BAPTA-AM.

(C) Quantification of nuclear/cytosolic fluorescence signal of rat cortical neurons transfected with  $\alpha$ 1HCT mRNA with different treatments.

Neurons were treated with either 20 mM K<sup>+</sup>, 100  $\mu$ M glutamate, or the calcium ionophore A23187 with or without a 5-minute pretreatment of BAPTA-AM.

N > 50 cells for each condition, \*p<0.05, \*\*p<0.01, \*\*\*p<0.001.

(D) Representative images of live rat cortical neurons loaded with both the live-cell nuclear stain Draq5 and the ratiometric calcium indicator Rhod-2, imaged pre-stimulation via uncaging glutamate (left panels), immediately after glutamate uncaging and consequent neuronal calcium stimulation (middle panels), and ten minutes post-stimulation (right panels). Scale bars = 10 microns.

(E) Representative imaging trace of Rhod-2  $\Delta F/F_0$  over a ten-minute imaging period in a live rat cortical neuron. Arrow indicates glutamate uncaging pulses.

(F) Quantification of Rhod-2  $\Delta F/F_0$  immediately pre- and post-stimulation in live rat cortical neurons.

N > 20 cells per condition for + Stim., N > 10 cells per condition for -Stim.

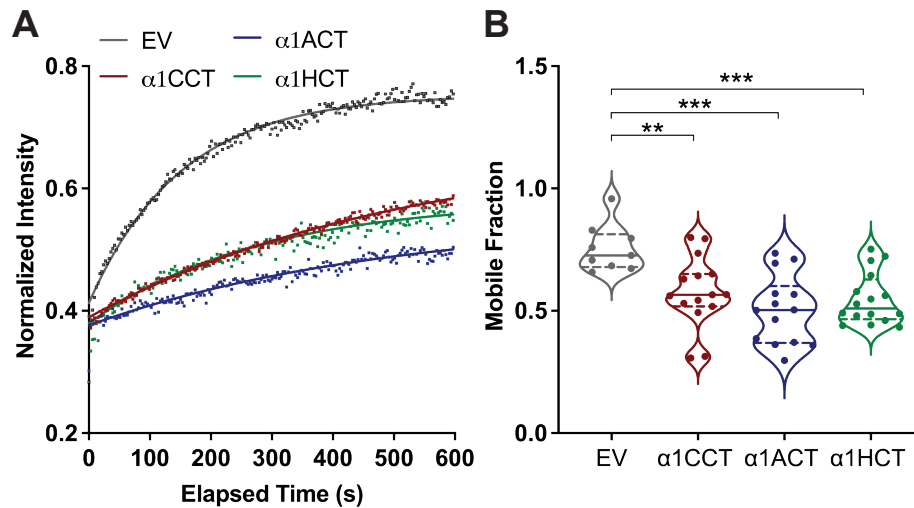

**Extended data Figure 3. FRAP analysis of  $\alpha$ 1CCT,  $\alpha$ 1ACT, and  $\alpha$ 1HCT in cultured rat cortical neurons.**

(A) FRAP recovery curves showing the normalized intensity over time for cultured rat cortical neurons expressing EmGFP,  $\alpha$ 1CCT-EmGFP,  $\alpha$ 1ACT-EmGFP, or  $\alpha$ 1HCT-EmGFP. EV-expressing cells exhibit the highest fluorescence recovery, indicating greater mobility compared to  $\alpha$ 1CCT,  $\alpha$ 1ACT, and  $\alpha$ 1HCT. The recovery profiles represent a nonlinear fit to the average of individually photobleached cells imaged for 10 minutes post-bleach.

(B) Quantification of the mobile fraction from the FRAP analysis. Cells expressing  $\alpha$ 1CCT,  $\alpha$ 1ACT, and  $\alpha$ 1HCT all show significantly reduced mobile fractions compared to EV, indicating restricted mobility.

N > 10 cells per condition, \* $p$ <0.05, \*\* $p$ <0.01, \*\*\* $p$ <0.001

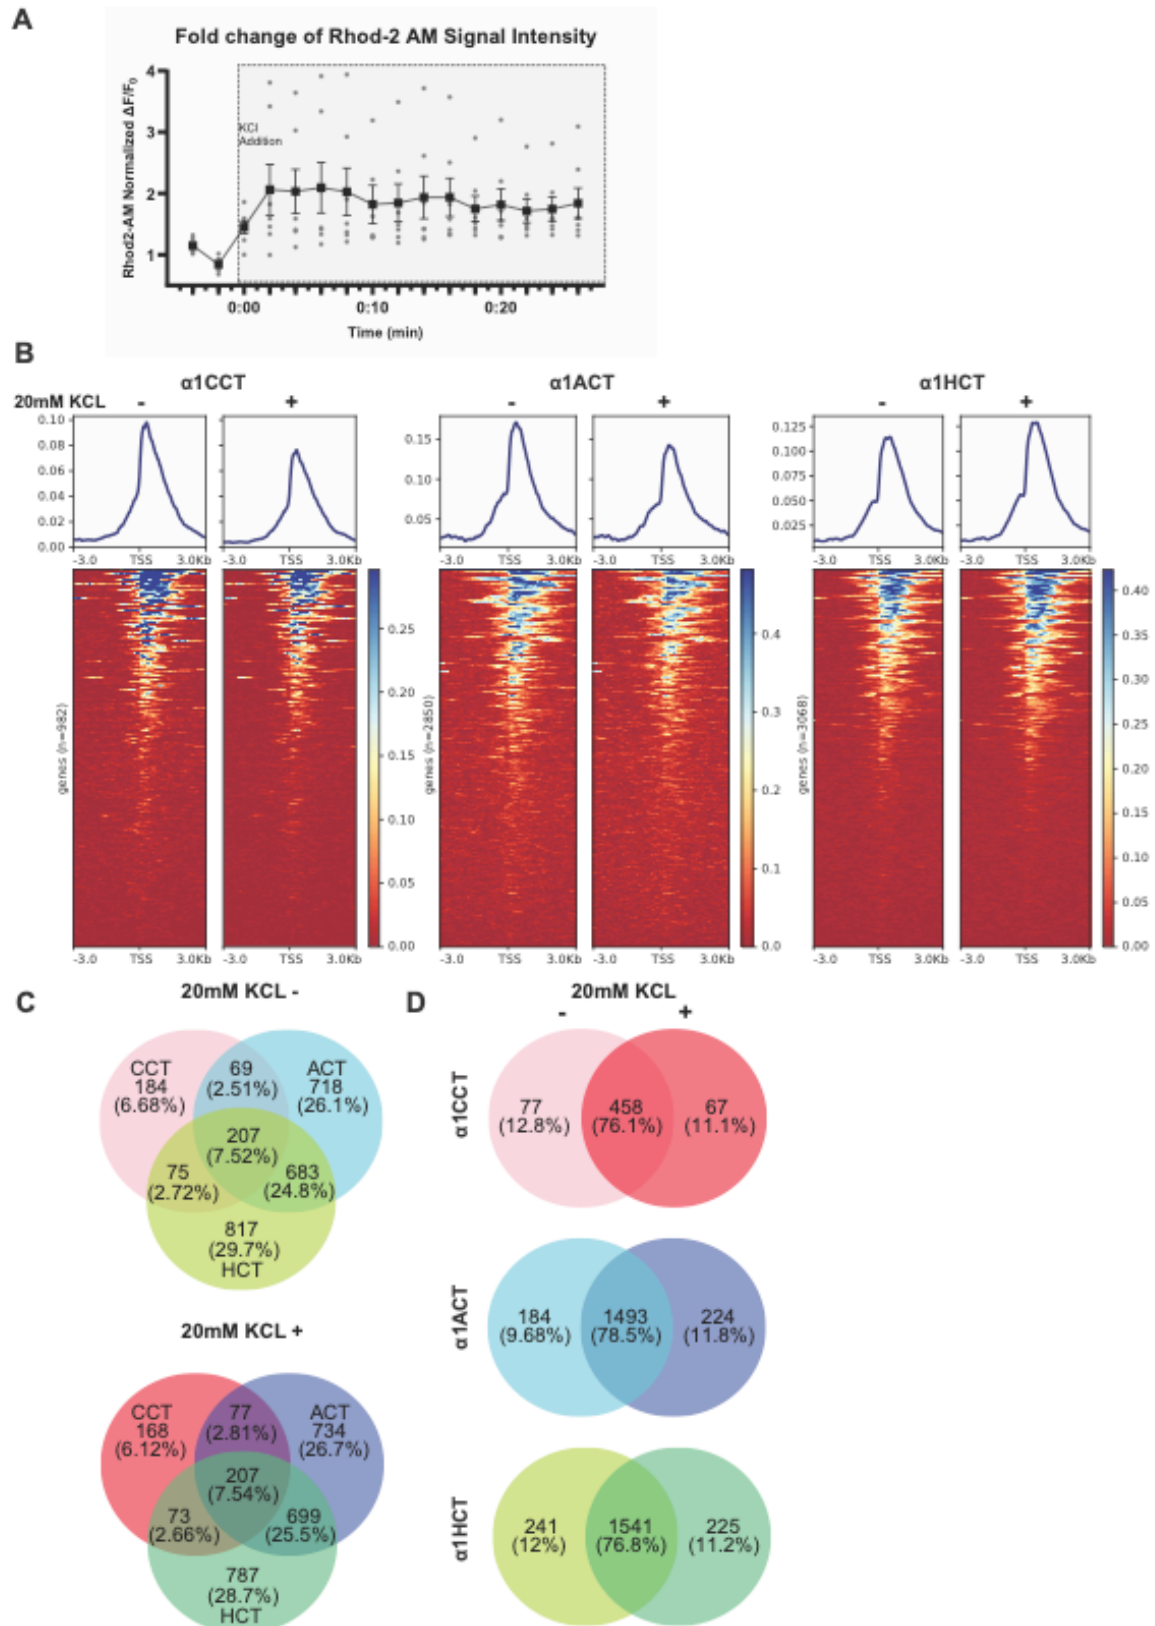

Extended data Figure 4. Intracellular  $Ca^{2+}$  changes with 20mM KCL, and CTPs' influence on the effects of H3K4me3-related genomic binding sites.

(A) Imaging trace of Rhod-2  $\Delta F/F_0$  in human neural progenitor cells (n=7) over a 26-minute imaging period. 20mM KCl was added to media 10 seconds before 0:00 minutes after a baseline was established. KCl addition indicated by gray box.

(B) CUT&RUN-seq profiles for H3K4me3 enrichment distribution within  $\pm 3000$ bp TSS in hNPC stable cell lines expressing  $\alpha 1$ CCT,  $\alpha 1$ ACT, and  $\alpha 1$ HCT under resting and depolarized conditions ( $\pm 20$  mM KCl).

(C) Venn diagrams depicting differentially enriched H3K4me3-associated DEGs in resting or depolarized conditions in hNPC stable cell lines expressing  $\alpha 1$ CCT,  $\alpha 1$ ACT, and  $\alpha 1$ HCT. Numbers indicate the count of unique and shared H3K4me3-associated DEGs.

(D) Comparative Venn diagrams of H3K4me3-associated DEGs across hNPC stable cell lines expressing  $\alpha 1$ CCT,  $\alpha 1$ ACT, and  $\alpha 1$ HCT in resting and depolarized conditions. The overlap between CTPs highlights distinct and shared regulatory elements modulated by H3K4me3.



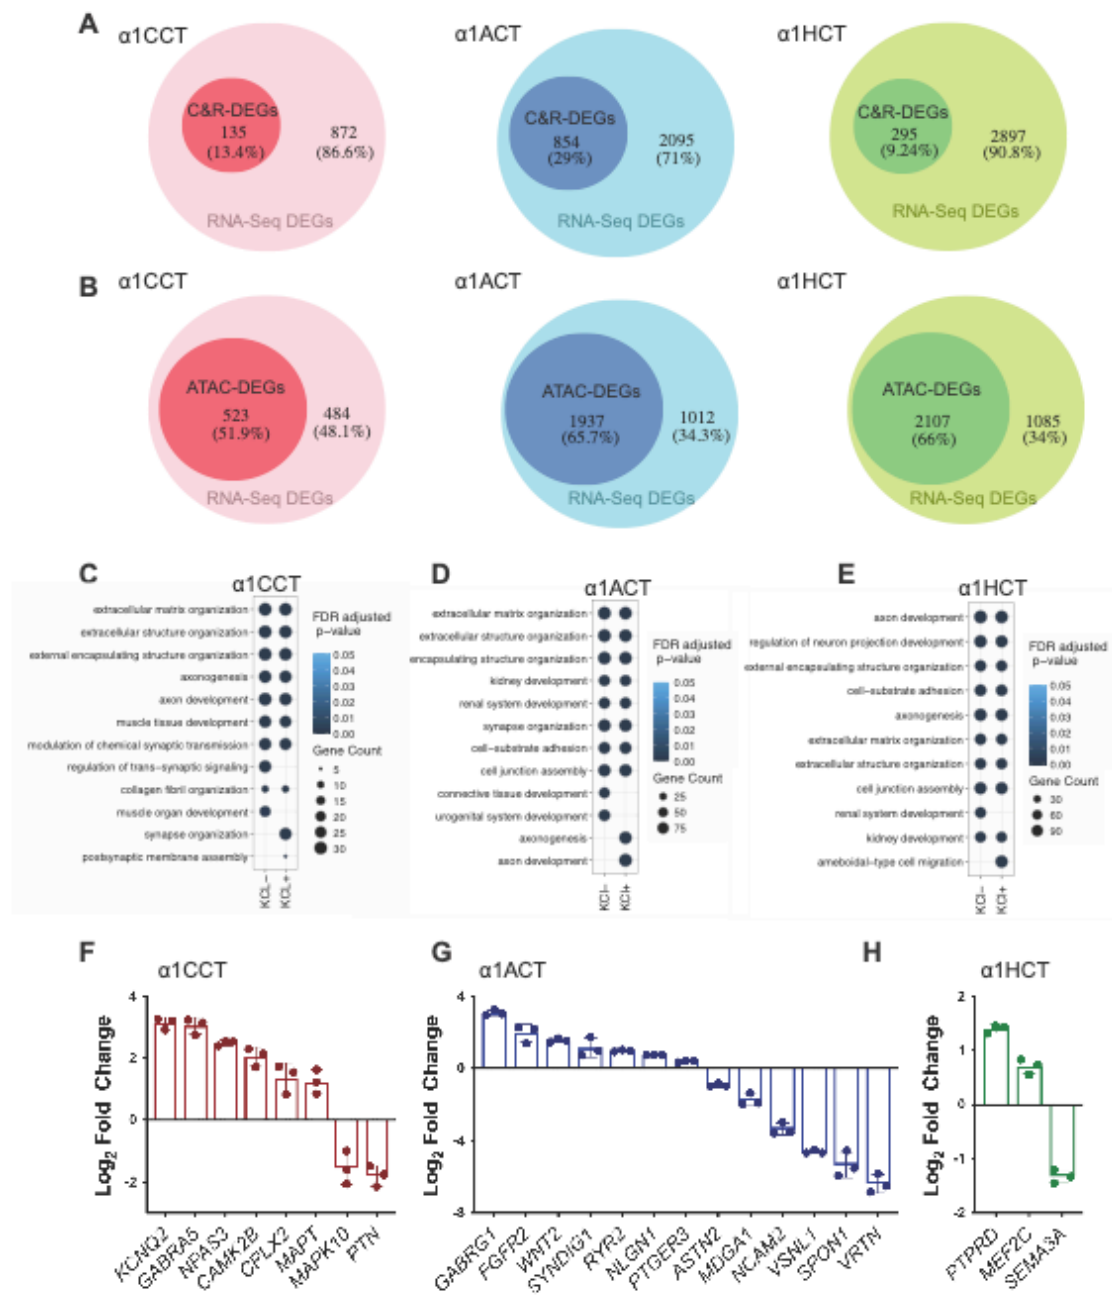

**Extended data Figure 5. Integration of CUT&RUN-seq or ATAC-seq with RNA-seq in hNPCs stably expressing  $\alpha 1CCT$ ,  $\alpha 1ACT$ , and  $\alpha 1HCT$ .**

(A) Venn diagrams showing the percentage of C&R -DEGs within RNA-seq-DEGs for  $\alpha 1CCT$  (left),  $\alpha 1ACT$  (middle), and  $\alpha 1HCT$  (right).

(B) Venn diagrams illustrating the percentage of ATAC-DEGs within RNA-seq-DEGs for  $\alpha$ 1CCT (left),  $\alpha$ 1ACT (middle), and  $\alpha$ 1HCT (right).

(C) Distinct enriched GO terms for RNA-seq DEGs directly regulated by  $\alpha$ 1CCT, inferred by ATAC-seq, in hNPCs stably expressing  $\alpha$ 1CCT, with or without 20 mM KCl treatment.

(D) Top enriched GO terms for RNA-seq DEGs directly regulated by  $\alpha$ 1ACT, inferred by ATAC-seq, in hNPCs stably expressing  $\alpha$ 1ACT, with or without 20 mM KCl treatment.

(E) Distinct enriched GO terms for RNA-seq DEGs directly regulated by  $\alpha$ 1HCT, inferred by ATAC-seq, in hNPCs stably expressing  $\alpha$ 1HCT, with or without 20 mM KCl treatment.

(F, G, and H) Quantification by qRT-PCR of the DEGs' mRNA level in hNPCs stably expressing  $\alpha$ 1CCT,  $\alpha$ 1ACT, and  $\alpha$ 1HCT.

**Table S1. Voltage-gated calcium channel nomenclature, predicted C-terminal protein size, and stop codon locations**

| <b>Protein Name</b> | <b>Alpha Subunit</b> | <b>Gene Name (human)</b> | <b>C-terminal Protein (Predicted Size)</b> | <b>Stop codon(s) location Amino Acid (Nucleotide)</b> | <b>Accession Number</b> |
|---------------------|----------------------|--------------------------|--------------------------------------------|-------------------------------------------------------|-------------------------|
| Cav1.1              | $\alpha$ 1S          | <i>CACNA1S</i>           | $\alpha$ 1SCT (37 kDa)                     | Q141* (C508T); Q464* (C1477T)                         | NM_000069.3             |
| Cav1.2              | $\alpha$ 1C          | <i>CACNA1C</i>           | $\alpha$ 1CCT (70 kDa)                     | G230* (G1264T); I1011* (ATC3607-3609TAG)              | NM_199460.3             |
| Cav1.3              | $\alpha$ 1D          | <i>CACNA1D</i>           | $\alpha$ 1DCT (60 kDa)                     | C333* (T1555A)                                        | NM_001128839.3          |
| Cav1.4              | $\alpha$ 1F          | <i>CACNA1F</i>           | $\alpha$ 1FCT (50 and 60 kDa)              | Q149* (C416T)                                         | NM_005183.4             |
| Cav2.1              | $\alpha$ 1A          | <i>CACNA1A</i>           | $\alpha$ 1ACT (75 kDa)                     | P1846* (CCC5791-5793TAG)                              | NM_023035.3             |
| Cav2.2              | $\alpha$ 1B          | <i>CACNA1B</i>           | $\alpha$ 1BCT (60 kDa)                     | E93* (G429T)                                          | NM_000718.4             |
| Cav2.3              | $\alpha$ 1E          | <i>CACNA1E</i>           | $\alpha$ 1ECT (55 kDa)                     | Q271* (C1039T)                                        | NM_000721.4             |
| Cav3.1              | $\alpha$ 1G          | <i>CACNA1G</i>           | $\alpha$ 1GCT (55 kDa)                     | Q701* (C2846T)                                        | NM_198382.3             |
| Cav3.2              | $\alpha$ 1H          | <i>CACNA1H</i>           | $\alpha$ 1HCT (70 kDa)                     | R1231* (C3939T, C3941A); S1234* (A3948T, C3950A)      | NM_021098.2             |
| Cav3.3              | $\alpha$ 1I          | <i>CACNA1I</i>           | $\alpha$ 1ICT (75 and 85 kDa)              | Q170* (C508T); Q440* (C1318T)                         | NM_001003406.2          |

**Table S2. Average percentage of subcellular localization**

| Protein expression | Nuclear |       |                         | Cytoplasm |       |                         |
|--------------------|---------|-------|-------------------------|-----------|-------|-------------------------|
|                    | Mean    | SEM   | N (# of fields of view) | Mean      | SEM   | N (# of fields of view) |
| $\alpha$ 1S        | 10.33   | 3.67  | 5                       | 89.67     | 3.67  | 5                       |
| $\alpha$ 1SSTOP    | 11.39   | 4.85  | 5                       | 88.61     | 4.85  | 5                       |
| $\alpha$ 1C        | 13.66   | 4.13  | 4                       | 86.34     | 4.13  | 4                       |
| $\alpha$ 1CSTOP    | 69.75   | 16.35 | 3                       | 30.25     | 16.35 | 3                       |
| $\alpha$ 1D        | 33.06   | 7.47  | 9                       | 66.94     | 7.47  | 9                       |
| $\alpha$ 1DSTOP    | 92.58   | 4.15  | 11                      | 7.42      | 4.15  | 11                      |
| $\alpha$ 1F        | 0.00    | 0.00  | 5                       | 100.00    | 0.00  | 5                       |
| $\alpha$ 1FSTOP    | 37.21   | 10.18 | 9                       | 62.79     | 10.18 | 9                       |
| $\alpha$ 1A        | 63.43   | 6.30  | 4                       | 36.57     | 6.30  | 4                       |
| $\alpha$ 1ASTOP    | 100.00  | 0.00  | 6                       | 0.00      | 0.00  | 6                       |
| $\alpha$ 1B        | 4.88    | 2.27  | 6                       | 95.12     | 2.27  | 6                       |
| $\alpha$ 1BSTOP    | 43.14   | 6.86  | 3                       | 56.86     | 6.86  | 3                       |
| $\alpha$ 1E        | 14.44   | 5.44  | 5                       | 85.56     | 5.44  | 5                       |
| $\alpha$ 1ESTOP    | 62.80   | 7.80  | 2                       | 37.21     | 7.80  | 2                       |
| $\alpha$ 1G        | 0.00    | 0.00  | 7                       | 100.00    | 0.00  | 7                       |
| $\alpha$ 1GSTOP    | 2.50    | 2.50  | 8                       | 97.14     | 2.86  | 7                       |
| $\alpha$ 1H        | 3.43    | 2.15  | 5                       | 96.57     | 2.15  | 5                       |
| $\alpha$ 1HSTOP    | 37.29   | 7.07  | 8                       | 62.71     | 7.07  | 8                       |
| $\alpha$ 1I        | 7.47    | 2.66  | 6                       | 92.53     | 2.66  | 6                       |
| $\alpha$ 1ISTOP    | 22.92   | 6.52  | 5                       | 77.08     | 6.52  | 5                       |

**Table S3. List of antagonists**

| <b>Treatment</b>  | <b>Concentration</b> | <b>Target</b>       | <b>Type</b> |
|-------------------|----------------------|---------------------|-------------|
| AP5               | 100 $\mu$ M          | NMDA Channel        | Antagonist  |
| Nifedipine (Nif)  | 10 $\mu$ M           | L-Type VGCC         | Antagonist  |
| W-7 Hydrochloride | 100 $\mu$ M          | Calmodulin          | Antagonist  |
| w-Agatoxin        | 500nM                | Ca <sub>v</sub> 2.1 | Antagonist  |
| TTA-A2            | 100 $\mu$ M          | T-Type VGCC         | Antagonist  |
| 2-APB             | 50 $\mu$ M           | IP3 Receptors       | Antagonist  |
| AP5               | 100 $\mu$ M          | NMDA<br>Receptors   | Antagonist  |

**Table S4.  $\alpha$ 1CCT and  $\alpha$ 1ACT nuclear signal changes with different treatments**

| Treatment              | Dose                      | Target                                  | EV               | $\alpha$ 1CCT                  | $\alpha$ 1CCT<br>Percent Change | $\alpha$ 1ACT                  | $\alpha$ 1ACT<br>Percent Change |
|------------------------|---------------------------|-----------------------------------------|------------------|--------------------------------|---------------------------------|--------------------------------|---------------------------------|
| Control                | --                        | --                                      | -3.1 $\pm$ 0.6%  | -0.02 $\pm$ 0.04%              | --                              | -0.01 $\pm$ 0.03%              | --                              |
| Glutamate (Glu.)       | 100 $\mu$ M               | --                                      | -2.6 $\pm$ 0.04% | +18.34 $\pm$ 1.5%<br>p<0.0001* | --                              | -10.73 $\pm$ 1.6%<br>p<0.0001* | --                              |
| AP5                    | 100 $\mu$ M               | NMDA Channel                            | +1.0 $\pm$ 0.05% | +11.39 $\pm$ 0.014%            | -6.95 $\pm$ 0.014%<br>p<0.0001  | -4.67 $\pm$ 0.038%             | +6.06 $\pm$ 0.038%<br>p<0.0001  |
| Nifedipine (Nif.)      | 10 $\mu$ M                | L-Type VGCC                             | +1.7 $\pm$ 0.04% | +3.1 $\pm$ 0.014%              | -15.24 $\pm$ 0.014%<br>p<0.0001 | -10.03 $\pm$ 0.020%            | +0.7 $\pm$ 0.020%<br>p=0.7211   |
| W-7<br>Hydrochloride   | 100 $\mu$ M               | Calmodulin                              | +0.0 $\pm$ 0.04% | +7.25 $\pm$ 0.5%               | -11.09 $\pm$ 0.5%<br>p<0.0001   | -5.76 $\pm$ 0.9%               | +4.97 $\pm$ 0.9%<br>p=0.0321    |
| $\omega$ -Agatoxin     | 500 nM                    | Ca <sub>v</sub> 2.1                     | +3.4 $\pm$ 0.2%  | +11.2 $\pm$ 0.021%             | -7.14 $\pm$ 0.021%<br>p=0.0012  | -12.67 $\pm$ 0.021%            | -1.94 $\pm$ 0.021%<br>p=0.3551  |
| TTA-A2                 | 100 $\mu$ M               | T-Type VGCC                             | +2.2 $\pm$ 0.6%  | +12.81 $\pm$ 0.020%            | -5.53 $\pm$ 0.020%<br>p=0.0071  | -12.14 $\pm$ 0.020%            | -1.41 $\pm$ 0.020%<br>p=0.4910  |
| 2-APB<br>and Ryanodine | 50 $\mu$ M<br>100 $\mu$ M | IP3 Receptors<br>Ryanodine<br>Receptors | -2.0 $\pm$ 0.2%  | +16.53 $\pm$ 2.8%              | -1.81 $\pm$ 2.8%<br>p=0.5720    | -13.49 $\pm$ 0.018%            | -2.76 $\pm$ 0.018%<br>p=0.1293  |

\* Compared to control

Highlighted columns reflect the data reported in manuscript
